# Supplementary material for: Back pain and body posture of non-professional Brazilian Jiu-Jitsu practitioners
Source: PeerJ. 2022 Mar 3;10:e12838. doi: 10.7717/peerj.12838 (PMC8898545; doi:10.7717/peerj.12838)
Supplement: Supplemental Information 1 — The measurements for all participants in two separated groups. [file peerj-10-12838-s001.xlsx]

## Sheet: badanie
LP.	Group	surname code	age[lata]	weight [kg]	hight[cm]	11.DCK	30.ALFA	31.BETA	32.GAMMA	41.DKP	40.KKP	42.RKP	43.GKP	36.DLL	35.KLL	37.RLL	38.GLL	25.KLB[mm]	21.UB[mm]	22.OL	17.TT	18.TS	15.KNM[st]	16.KSM[st]	sex[K-1 /M-2]	physical activity [TAK-1/ NIE-2]	how many years do you train bjj?	[TAK-1/ NIE-2]	W jakim stopniu?	Czy doznałeś innych kontuzji? [TAK-1/ NIE-2]	OSWESTRY
1	bjj grup	A1	31	68	175	463.1	4.9	6.8	8.1	190.9	165.1	312.9	20.3	96.4	168.3	150.3	0.8	5.7	2.3	-14.4	6.7	-16.2	1.8	-3.4	2	1	3	1	3	1	18
2	bjj grup	A2	30	80	180	483.9	0.5	10.9	13.2	202.3	155.9	329.9	25.6	93.6	169.6	154.1	10.5	18.9	15.1	13.6	-10.5	-3.8	3.2	-5.5	2	1	2	1	2	2	11
3	bjj grup	A3	31	68	158	412.1	15	9.1	8.7	192.8	162.3	294.9	18.8	73.3	156	117.2	4.5	0	-0.8	8.6	-2.9	7.6	-4.1	0.9	1	1	1	1	0	1	11
4	bjj grup	A4	28	92	182	475.4	2.5	6.5	8	150.3	165.5	330.8	14.3	87	176	144.6	12.8	11.3	2.3	11.8	10.5	-3.8	3.3	-2.1	2	2	1	1	6	1	13
5	bjj grup	A5	28	77	185	463.1	1.5	7.4	13.4	176.8	159.1	333.7	12.8	55.8	171	129.5	17.3	7.6	-9.8	-11.6	5.7	-4.8	0.5	0.8	2	1	11	1	5	1	18
6	bjj grup	A6	25	68	166	424.4	12.9	9.8	4.9	176.8	165.3	297.7	24.8	95.5	157.3	126.7	1.5	8.5	-15.1	7.5	14.3	8.6	2.9	-1.9	1	2	1.5	1	8	1	13
7	bjj grup	A7	25	62	168	445.2	2.1	8.7	7.8	186.2	163.5	318.5	21.8	81.3	169.2	126.7	5.3	5.7	0.8	3.8	12.4	-9.5	-2.5	1	1	1	1	1	6	1	13
8	bjj grup	A8	37	95	175	501.9	4.5	4.9	6.1	212.7	169	330.8	8.3	105.9	170.6	171.1	7.5	-12.3	-0.8	11.9	-8.6	3.8	0.6	-1	2	1	13	1	3	1	14
9	bjj grup	A9	25	80	170	462.2	9.7	5.1	11.4	197.5	163.4	302.5	12.8	105.9	165.2	159.7	1.5	17	7.5	-13.3	4.8	-15.2	2.1	-2.5	1	1	2	1	4	1	10
10	bjj grup	A10	41	84	186	470.7	2.6	8.7	8.7	157.8	162.7	324.2	24.1	115.3	168.7	146.5	6	0	-4.5	24.2	1	11.4	-2.7	0	2	1	1	1	2	1	13
11	bjj grup	A11	37	93	180	485.8	3.5	7.1	11.3	158.8	161.6	328.9	21.8	134.2	169.3	156.9	2.3	12.3	-4.5	8.4	-15.2	-14.3	1.8	-2.8	2	1	4	2		1	10
12	bjj grup	A12	25	78	183	473.5	2.6	8.9	9	161.6	162.1	327	24.8	115.3	168.5	146.5	6	0	-4.5	20.3	1	11.4	-2.7	0	2	1	0.83	2		2	15
13	bjj grup	A13	33	80	185	489.6	2.3	8.6	10.3	181.5	161.1	335.5	24.1	113.4	169.1	154.1	5.3	8.5	-8.3	13.3	-3.8	-12.4	-2.4	-2.4	2	1	3	2		1	12
14	bjj grup	A14	35	111	180	476.4	8.2	6.6	10.7	194.7	162.7	339.3	18.8	72.8	165.2	137.1	5.3	-4.7	0	8.6	-9.5	1	-4.1	-0.4	2	2	7	2		1	10
15	bjj grup	A15	31	67	171	454.6	2.2	7.7	14.2	196.6	158.1	305.3	12.8	58.6	174.5	149.3	14.3	-5.7	-15.1	10.9	-1	21.9	-4	1.9	2	1	16	2		1	10
16	bjj grup	A16	25	78	177	446.1	3.5	3.7	12.8	186.2	163.5	310	9.8	98.3	172.8	136.1	0.8	-18.9	-9	30.5	1.9	15.2	-2.5	5	2	1	1	1	6	2	10
17	bjj grup	A17	29	90	186	484.9	5.6	10.5	49.4	198.5	120.1	331.8	27.8	115.3	163.9	153.1	3.8	5.7	0	-6.7	1.9	-5.7	4.2	-0.8	2	1	8	2		1	13
18	bjj grup	A18	27	90	178	471.7	10	7.1	10.8	166.4	162.2	334.6	22.6	111.1	162.9	137.1	1.5	13.2	6	9.8	1	-2.9	2	-5.5	2	1	2	2		2	12
19	bjj grup	A19	43	89	190	519.9	2.9	6.9	9.9	177.7	163.3	345	13.5	73.7	176	174.9	18.8	-17	0.8	17.1	3.8	7.6	1.3	0	2	1	1.5	2		1	15
20	bjj grup	A20	33	75	179	466.9	4.8	9.2	13.9	175.8	156.9	315.7	24.1	71.8	166	151.2	11.3	1.9	1.5	-11.2	-11.4	-15.2	-1.2	2.3	2	1	12	1	5	1	16
21	bjj grup	A21	42	88	180	507.6	3.8	5.4	13.9	215.5	160.7	324.2	5.3	68.5	170.8	183.4	15.8	29.3	0	44.8	4.8	-2.9	2.6	-5.2	2	1	3	1	5	1	16
22	bjj grup	A22	37	85	177	496.2	3.5	6.2	16.9	188.1	156.9	327	12	121.9	170.2	169.2	8.3	26.5	-0.8	-1.2	-20	-4.8	-0.6	-4.5	2	1	2	1	2	1	14
23	bjj grup	A23	26	81	195	510.4	3.1	3.7	9.9	156	166.4	342.2	12	124.8	173.1	168.2	3	-6.6	0	7.8	-3.8	-1.9	-1.8	-0.5	2	1	0.75	2		2	11
24	bjj grup	A24	34	77	175	484.9	2.1	5.2	9.8	190.9	165	335.5	12.8	102.1	177	149.3	4.5	9.5	-6	19.1	-9.5	-2.9	0	-5.3	2	1	1	1	3	1	12
25	bjj grup	A25	37	91	190	471.7	7.2	6	9	209.8	165	305.3	12.8	112.5	166.7	166.4	3	6.6	7.5	-5.7	-21.9	-10.5	2.8	-6.3	2	1	2	1	3	1	11
26	bjj grup	A26	31	73	179	462.2	1.3	8.4	10.7	195.7	160.9	294.9	16.6	103	170.4	167.3	7.5	0	-7.5	-1.3	20	9.5	1.2	0	2	1	1.5	1	3	1	10
27	bjj grup	A27	30	73	179	462.2	4.6	8.6	11.5	195.7	159.8	294.9	16.6	103	166.8	167.3	8.3	0	-7.5	-4.1	20	9.5	1.2	0	2	1	5	1	4	1	12
28	bjj grup	A28	29	78	175	449.9	11.5	6.2	13.9	170.1	159.9	330.8	18.1	77.5	162.3	119.1	3.8	0	-7.5	13.3	-12.4	-1	0.7	2.2	2	1	1	1	6	1	15
29	bjj grup	A29	33	70	175	473.5	7.9	6.1	8.3	211.7	165.6	311	14.3	113.4	166	162.6	1.5	6.6	7.5	-5.6	-21.9	-10.5	4	-6.4	2	1	1.5	1	2	1	11
30	bjj grup	A30	29	85	182	506.6	4.3	3	43.1	248.6	133.9	321.4	1.5	69.9	172.7	185.3	8.3	-0.9	6	1.8	-18.1	2.9	2.9	-2.8	2	1	3	1	6	1	14
31	bjj grup	A31	37	90	190	520.8	5	6.8	48.6	203.2	124.6	343.1	8.3	77.5	178.2	177.7	20.3	-8.5	3.8	3.8	0	-1	1.7	0	2	1	8	1	6	1	17
						11.DCK	30.ALFA	31.BETA	32.GAMMA	41.DKP	40.KKP	42.RKP	43.GKP	36.DLL	35.KLL	37.RLL	38.GLL	25.KLB[mm]	21.UB[mm]	22.OL	17.TT	18.TS	15.KNM[st]	16.KSM[st]	płeć [K-1 /M-2]	Czy uprawiasz inna aktywność fizyczną? [TAK-1/NIE -2]		[TAK -1 /NIE -2]	W jakim stopniu?	Czy doznałeś innych kontuzji? [TAK-1/NIE-2]	OSWESTRY
1	control grup	B1	43	80	175	427.2	6.2	7.9	8.9	173	163.2	295.8	17.3	75.6	165.8	131.4	7.5	-7.6	-8.3	4.2	6.7	8.6	-2	2.4	2	1		2		2	10
2	control grup	B2	27	71	185	472.6	0.4	4.4	6.9	181.5	168.7	302.5	9	97.4	176	170.1	6	9.5	-6	27.6	10.5	15.2	-2.4	1	2	1		1	1	1	10
3	control grup	B3	28	64	169	411.2	9.2	10.3	9.1	188.1	160.6	285.5	18.8	69.9	160.5	125.7	9	1.9	6	-7.8	18.1	-6.7	-4.7	2.1	1	1		2		2	10
4	control grup	B4	24	82	189	499.1	1.9	7.1	4.9	183.4	168	332.7	17.3	92.6	174.7	166.4	10.5	2.8	9.8	2.6	-12.4	-7.6	4.8	-3.8	2	1		2		1	11
5	control grup	B5	31	59	163	402.7	4.6	7.5	7.7	156	164.8	275.1	13.5	74.7	167.9	127.6	9	3.8	6	-2.3	-1.9	-8.6	1.5	-3.2	1	2		2		1	10
6	control grup	B6	28	55	162	406.4	6.5	8.5	7.9	184.3	163.6	276	16.6	66.2	165	130.4	6.8	3.8	-2.3	19.1	7.6	10.5	-0.6	-1	1	2		1	5	2	17
7	control grup	B7	28	68	170	409.3	5.1	6.5	11.4	179.6	162.1	291.1	14.3	85.1	168.4	118.2	2.3	-5.7	-3.8	3.8	9.5	5.7	0	-2.2	2	1		1	3	2	10
8	control grup	B8	26	62	177	466	2.1	6.5	8.5	202.3	165.1	311	14.3	104	171.5	155	3.8	5.7	13.5	12.4	-13.3	-7.6	-1.1	-4.4	2	2		2		2	10
9	control grup	B9	26	83	178	428.2	3.8	6.2	16.1	143.7	157.7	295.8	15.1	91.7	170	132.3	6	3.8	0.8	17.2	-4.8	9.5	3.4	-4.5	2	1		1	4	1	13
10	control grup	B10	32	95	187	434.8	1	10.3	12.7	176.8	157	302.5	21.8	84.1	170.7	132.3	9.8	8.5	4.5	7.2	7.6	-13.3	-2.3	-1.5	2	1		2		2	10
11	control grup	B11	30	130	193	455.6	5.7	6.6	12.9	220.2	160.5	283.6	3.8	60.5	167.7	172	16.6	7.6	12	-2.9	3.8	-3.8	1.8	-2.5	2	1		1	5	1	15
12	control grup	B12	28	81	187	448	2.4	9.2	43	244.8	127.8	332.7	12.8	72.8	168.5	115.3	8.3	-2.8	0	-9.1	5.7	9.5	-1.9	1	2	1		2		2	10
13	control grup	B13	26	74	184	448	5.6	13.1	12.9	197.5	154	338.4	36.9	53.9	161.3	109.6	9	-0.9	0.8	2.9	-18.1	4.8	1.2	-1.4	2	1		1	5	2	12
14	control grup	B14	35	88	193	492.4	3.3	7.1	7.4	185.3	165.5	331.8	18.8	132.3	169.6	160.7	3	19.8	0.8	12.6	10.5	0	3	-0.4	2	1		1	3	1	15
15	control grup	B15	26	53	163	426.3	6.1	6.8	7.9	178.6	165.3	279.8	14.3	84.1	167	146.5	5.3	0	0	17.2	-11.4	7.6	0.6	-2.2	1	1		2		2	10
16	control grup	B16	25	67	179	458.4	1.4	12.6	45.7	221.2	121.7	317.6	18.8	92.6	166	140.8	13.5	9.5	7.5	-1.2	9.5	-2.9	-1.3	-1	2	1		2		1	13
17	control grup	B17	31	79	175	439.5	7.4	7.8	6.6	207	165.5	320.4	15.8	52	164.7	119.1	9	17	8.3	13.6	13.3	-5.7	1.3	-2.1	2	1		1	6	2	17
18	control grup	B18	32	94	181	483.9	3.7	7.8	47.2	215.5	125	328.9	14.3	115.3	168.4	155	6.8	4.7	-6.8	6.7	11.4	7.6	-1.6	-3	2	1		1	4	2	12
19	control grup	B19	29	78	178	458.4	3.6	6.3	47.4	207.9	126.4	315.7	12.8	106.8	170.1	142.7	3	15.1	0	21	8.6	-11.4	-3	0.5	2	1		2		2	10
20	control grup	B20	25	80	183	439.5	4.7	9.6	12.7	176.8	157.7	265.6	12.8	120	165.8	173.9	11.3	-26.5	-7.5	5.7	-37.2	17.2	-1.8	1.9	2	1		1	1	1	11
21	control grup	B21	31	83	198	458.4	1.6	8.8	10.3	223.1	160.9	330.8	17.3	108.7	172.8	127.6	2.3	7.6	8.3	3.8	27.6	-10.5	0.6	-3.9	2	1		2		1	11
22	control grup	B22	27	77	178	427.2	1.3	10.7	7.7	190	161.6	304.4	22.6	98.3	167.9	122.9	3.8	-2.8	-1.5	10.5	-7.6	-1.9	-0.9	-1.1	2	1		2		1	10
23	control grup	B23	31	79	180	436.7	2.9	8	4.3	198.5	167.6	287.3	14.3	104.9	169.1	149.3	4.5	6.6	7.5	3.9	20	-2.9	0	0	2	1		1	1	1	13
24	control grup	B24	30	70	171	418.7	7.5	10.5	11.9	189	157.6	287.3	18.8	74.7	162.1	131.4	9.8	0	2.3	-3	-3.8	1	-1.2	-2.3	2	1		1	2	1	13
25	control grup	B25	37	82	180	428.2	2.7	12.1	6.4	223.1	161.5	290.2	14.3	96.4	165.2	138	9	12.3	-2.3	3.8	18.1	-5.7	4	-0.9	2	1		2		1	12
26	control grup	B26	25	67	185	476.4	6.2	10.3	9.9	225	159.8	327	19.6	89.8	163.5	149.3	9.8	6.6	-1.5	-6	7.6	11.4	1.1	-2.2	2	2		1	4	1	13
27	control grup	B27	27	64	180	465	3.9	6	11.9	199.4	162.1	313.8	9	100.2	177.9	151.2	8.3	-14.2	-1.5	22	17.2	36.2	0	2.7	2	1		1	3	1	12
28	control grup	B28	34	78	185	460.3	3.3	5.3	5	181.5	169.8	314.8	13.5	66.2	171.5	145.6	6	15.1	5.3	-6.6	32.4	1	0	-4.6	2	1		1	4	2	16
29	control grup	B29	30	88	194	477.3	4.8	5.1	12.7	167.3	162.3	349.7	17.3	71.8	170.2	127.6	3.8	-0.9	-2.3	1.5	-21.9	-2.9	1.1	-0.5	2	1		2		1	13
30	control grup	B30	38	95	184	456.5	6.9	9.9	11.2	212.7	158.9	331.8	27.1	80.3	163.1	124.8	1.5	17	4.5	-10.5	15.2	0	0	-2.7	2	1		2		1	11
